# Supplementary material
Source: PubMed Central journal article supplement (PMC10538373)
Supplement: NIHMS1933227-supplement-Figure_S1.pdf [file NIHMS1933227-supplement-Figure_S1.pdf]

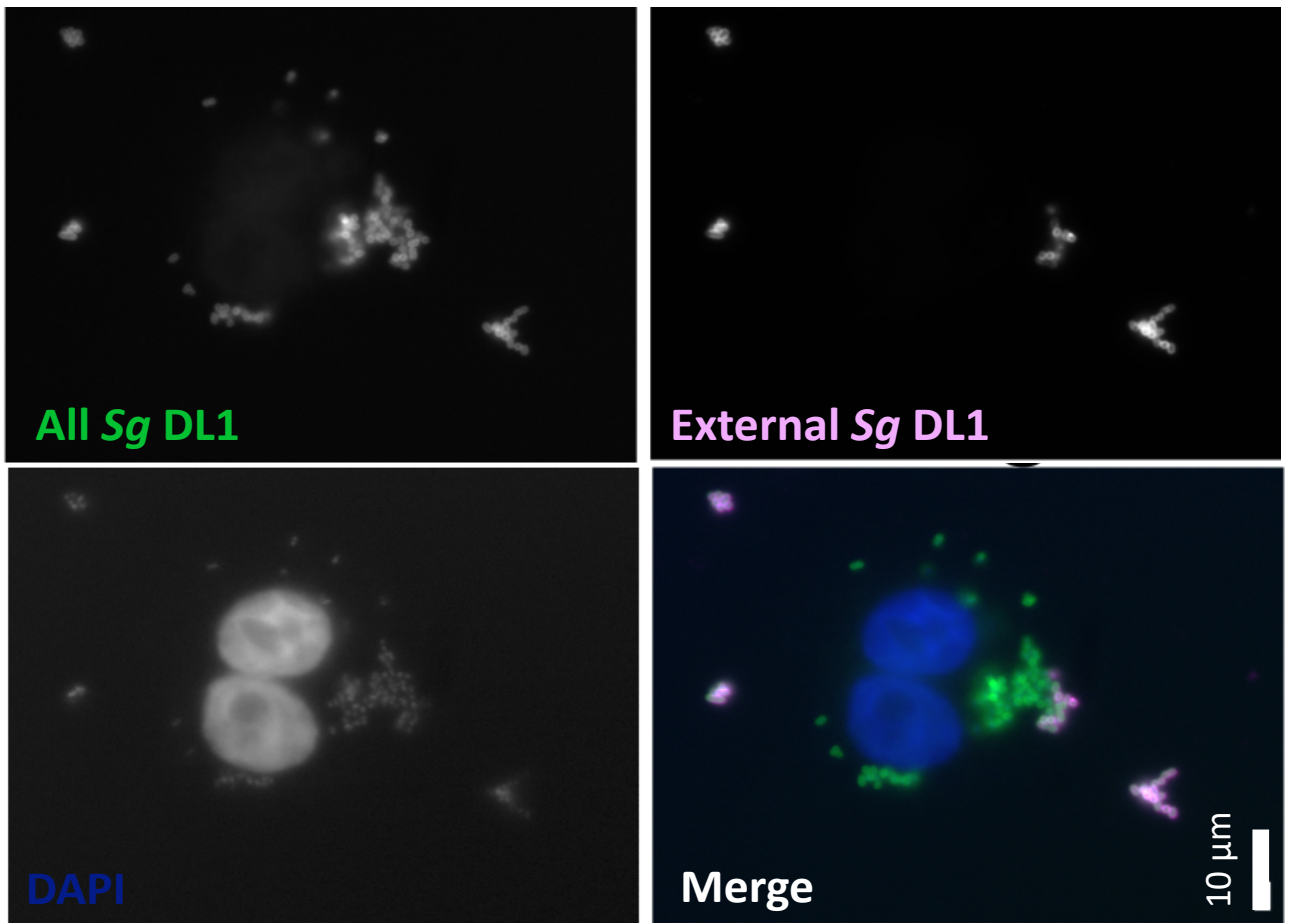

**Supplemental Figure 1.** Representative images showing internalized *S. gordonii* DL1 within PMA differentiated THP-1 macrophages. The phagocytic index for *S. gordonii* was an average of 1.9 bacteria per cell. Bacteria were pre-labeled with biotin-hydrazide and Alexa Fluor 488-hydrazide (Invitrogen). After 30 minutes streptavidin-AF594 was added to label only external bacteria. Phagocytic index was determined by counting number of internalized bacteria for at least 100 cells.
