# Supplementary material
Source: PubMed Central journal article supplement (PMC10538373)
Supplement: NIHMS1933227-supplement-Figure_S2.pdf [file NIHMS1933227-supplement-Figure_S2.pdf]

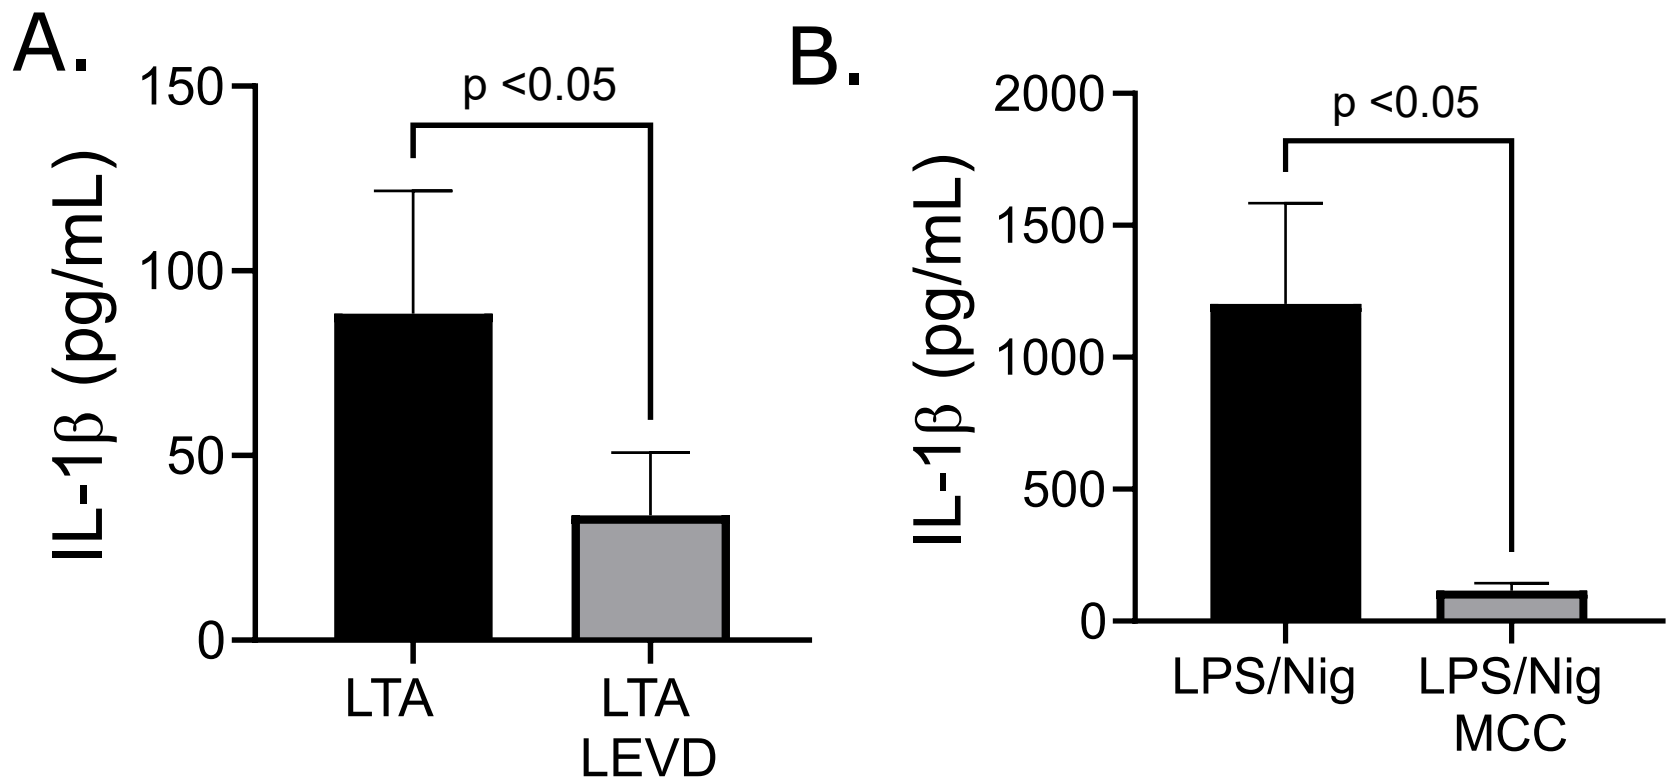

**Supplemental Figure 2.** (A + B) IL-1 release from PMA differentiated THP-1 macrophages analyzing the effectiveness of the small molecule inhibitors. (A) LTA transfected macrophages with or without Ac-LEVD-CHO (Caspase-4/5 inhibitor) added for 4 hours. (B) Four hour LPS primed macrophages stimulated with Nigericin for 1 hour with or without MCC950 (NLRP3 inhibitor). P value was calculated by unpaired t-test.
